# Supplementary material for: Traumatic Brain Injury Severity in a Network Perspective: A Diffusion MRI Based Connectome Study
Source: PubMed Central journal article supplement (PMC7272462; doi:10.1038/s41598-020-65948-4), 2020-06-04
Supplement: 41598_2020_65948_MOESM1_ESM.pdf [file 41598_2020_65948_MOESM1_ESM.pdf]

**Traumatic Brain Injury Severity in a Network Perspective:  
A Diffusion MRI Based Connectome Study**

Reut Raizman, Ido Tavor, Anat Biegon, Sagi Harnof, Chen Hoffmann, Galia Tsarfaty, Eyal Fruchter,  
Lucian Tatsa-Laur, Mark Weiser, Abigail Livny.

| Measure                       | Description                                                                                                                                                                   | Weighted Mathematical Definition                                                                                                     |
|-------------------------------|-------------------------------------------------------------------------------------------------------------------------------------------------------------------------------|--------------------------------------------------------------------------------------------------------------------------------------|
| <b>Centrality</b>             |                                                                                                                                                                               |                                                                                                                                      |
| <b>Strength (degree)</b>      | Number of edges connected to a node.                                                                                                                                          | $S_i = \sum_{j \in N} w_{ij}$                                                                                                        |
| <b>Betweenness centrality</b> | Number of all shortest paths (the number of minimal 'steps' required for connecting a pair of nodes) in the network that contains a given node                                | $BC_z = \sum_{i \in N, j \in N} \frac{\sigma_{ij}(z)}{(\sigma_{ij})}$                                                                |
| <b>Integration</b>            |                                                                                                                                                                               |                                                                                                                                      |
| <b>Global efficiency</b>      | Mean inverse shortest path length in the network.                                                                                                                             | $E_{glob}^w = \frac{1}{n} \sum_{i \in N} \frac{\sum_{j, h \in N, j \neq i} (d_{ji}^w)^{-1}}{(n-1)}$                                  |
| <b>Segregation</b>            |                                                                                                                                                                               |                                                                                                                                      |
| <b>Clustering coefficient</b> | Fraction of triangles around a node (i.e., fraction of neighbors of node i that are neighbors of each other). This measure reflects the tendency of nodes to cluster together | $C_i^w = \frac{1}{n} \sum_{i \in N} \frac{2t_i^w}{k_i(k_i - 1)}$                                                                     |
| <b>Local efficiency</b>       | Efficiency of connections between (first-degree) neighbors of a node (i.e., $E_{loc_i}^w$ reflects the global efficiency of the neighborhoods of node i).                     | $E_{loc}^w = \frac{1}{2} \sum_{i \in N} \frac{\sum_{j, h \in N, j \neq i} (w_{ij} w_{ih} [d_{jh}^w(N_i)]^{-1})^{1/3}}{k_i(k_i - 1)}$ |

**Supplementary Table S1:** A description and mathematical definitions of all measures used in the current study, based on the work of Rubinov and Sporns in 2010.

Edges (i, j) are associated with connection weights  $w_{ij}$ . N is the set of all nodes in the network, and n is the number of nodes.  $a_{ij}$  is the connection status between i and j. u,v are different modules.  $d_{ij}$  is the distance between i and j.  $k_i$  is the degree of i.  $t_i$  is the number of triangles around i.  $\sigma_{ij}$  is the shortest path between i and j.

a:

| Measure                | F(2,43) | p      |
|------------------------|---------|--------|
| Strength               | 5.117   | 0.011* |
| Global efficiency      | 5.040   | 0.011* |
| Clustering coefficient | 5.575   | 0.007* |

b:

| Regions                    | Control > msTBI | Control > mTBI | mTBI > msTBI |
|----------------------------|-----------------|----------------|--------------|
| Superior Frontal L         | .003*           | .988           | .037*        |
| Superior Frontal R         | .003*           | .977           | .045*        |
| Superior Medial Frontal L  | .001*           | .790           | .070         |
| Supplementary motor area L | .004*           | .932           | .082         |
| Anterior Cingulate L       | .000*           | .993           | .001*        |
| Anterior Cingulate R       | .002*           | .650           | .143         |
| Medial Orbital Frontal L   | .002*           | .745           | .001*        |
| Medial Orbital Frontal R   | .002*           | 1              | .014*        |
| Caudate L                  | .001*           | .950           | .018*        |
| Olfactory R                | .008*           | .996           | .026*        |

**Supplementary Table S2:** A: Global difference between the injury severity groups, using age as covariate and the false discovery rate (FDR) correction. B: Local strength's p-values in all significant regions: post-hoc multiple comparisons using LSD correction with age as a covariate. R, right; L, left; mTBI, mild traumatic brain injury; msTBI, moderate-severe traumatic brain injury. \*FDR corrected.

| <b>Hub's Rank</b> | <b>Control</b>                | <b>mTBI</b>                   | <b>msTBI</b>                  |
|-------------------|-------------------------------|-------------------------------|-------------------------------|
| <b>1</b>          | Putamen R                     | Hippocampus R                 | Putamen R                     |
| <b>2</b>          | Hippocampus R                 | Superior Frontal<br>Orbital L | Superior Frontal<br>Orbital L |
| <b>3</b>          | Thalamus R                    | Middle Occipital L            | Middle Temporal L             |
| <b>4</b>          | Superior Parietal R           | Putamen R                     | Putamen L                     |
| <b>5</b>          | Superior Frontal<br>Orbital L | Superior Parietal L           | Hippocampus R                 |
| <b>6</b>          | Putamen L                     | Superior Parietal R           | Superior Frontal L            |
| <b>7</b>          | Hippocampus L                 | Hippocampus L                 | Superior Parietal R           |
| <b>8</b>          | Middle Occipital L            | Thalamus R                    | Insula R                      |
| <b>9</b>          | Superior Frontal R            | Putamen L                     | Middle Occipital L            |

**Supplementary Table S3:** hub's rank in each group, using betweenness centrality; R, right; L, left.

| Region/Network Measures   | Strength                  |                | Efficiency                |                | Cluster Coefficient       |       |
|---------------------------|---------------------------|----------------|---------------------------|----------------|---------------------------|-------|
|                           | Groups                    | p              | Groups                    | p              | Groups                    | p     |
| Superior Frontal L        | Control > msTBI           | .001*          | Control > msTBI           | .001*          | Control > msTBI           | .000* |
|                           | Control > mTBI            | .429           | Control > mTBI            | .000*          | Control > mTBI            | .046* |
|                           | mTBI > msTBI              | .013*          | mTBI < msTBI              | .738           | mTBI > msTBI              | .078  |
| Superior Frontal R        | Control > msTBI           | .001*          | Control > msTBI           | .000*          | ANOVA was not significant |       |
|                           | Control > mTBI            | .436           | Control > mTBI            | .000*          |                           |       |
|                           | mTBI > msTBI              | .013*          | mTBI > msTBI              | .714           |                           |       |
| Superior Frontal medial L | Control > msTBI           | .000*          | Control > msTBI           | .045*          | Control > msTBI           | .006* |
|                           | Control < mTBI            | .488           | Control > mTBI            | .071           | Control > mTBI            | .187  |
|                           | mTBI > msTBI              | .007*          | mTBI > msTBI              | .772           | mTBI > msTBI              | .159  |
| Superior Occipital L      | ANOVA was not significant |                | Control > msTBI           | .000*          | ANOVA was not significant |       |
|                           |                           | Control > mTBI | .000*                     |                |                           |       |
|                           |                           | mTBI > msTBI   | .314                      |                |                           |       |
| Middle Occipital L        | ANOVA was not significant |                | Control > msTBI           | .003*          | ANOVA was not significant |       |
|                           |                           | Control > mTBI | .000*                     |                |                           |       |
|                           |                           | mTBI < msTBI   | .378                      |                |                           |       |
| Superior Parietal L       | ANOVA was not significant |                | Control < msTBI           | .035*          | ANOVA was not significant |       |
|                           |                           | Control < mTBI | .001                      |                |                           |       |
|                           |                           | mTBI > msTBI   | .329                      |                |                           |       |
| Putamen L                 | ANOVA was not significant |                | ANOVA was not significant |                | Control > msTBI           | .015* |
|                           |                           |                |                           | Control > mTBI | .262                      |       |
|                           |                           |                |                           | mTBI > msTBI   | .198                      |       |
| Putamen R                 | ANOVA was not significant |                | Control < msTBI           | .006*          | ANOVA was not significant |       |
|                           |                           | Control < mTBI | .005*                     |                |                           |       |
|                           |                           | mTBI < msTBI   | .922                      |                |                           |       |

**Supplementary Table S4:** Network measures in hubs: post-hoc multiple comparisons using LSD correction.

ANOVA tests showed significant differences between groups in some network measures within the hub regions that were tested (corrected for multiple comparisons, n=44). R, right; L, left; mTBI, mild traumatic brain injury; msTBI, moderate-severe traumatic brain injury. \*FDR corrected.

| Regions                    | Control > msTBI | Control > mTBI | mTBI > msTBI |
|----------------------------|-----------------|----------------|--------------|
| Superior Frontal L         | .001*           | .429           | .034*        |
| Superior Frontal R         | .001*           | .436           | .013*        |
| Superior Medial Frontal L  | .000*           | .488           | .007*        |
| Supplementary motor area L | .001*           | .800           | .007*        |
| Anterior Cingulate L       | .000*           | .886           | .000*        |
| Anterior Cingulate R       | .001*           | .165           | .035*        |
| Medial Orbital Frontal L   | .000*           | .936           | .002*        |
| Medial Orbital Frontal R   | .000*           | .391           | .011*        |
| Caudate L                  | .000*           | .172           | .012*        |
| Olfactory R                | .002*           | .656           | .003*        |

**Supplementary Table S5:** Local strength's p-values in all significant regions: post-hoc multiple comparisons using LSD correction. R, right; L, left; mTBI, mild traumatic brain injury; msTBI, moderate-severe traumatic brain injury. \*FDR corrected.
